# Supplementary material for: An mTOR and DNA-PK dual inhibitor CC-115 hinders non-small cell lung cancer cell growth
Source: PubMed Central journal article supplement (PMC9206683; doi:10.1038/s41420-022-01082-6), 2022-06-18

**Figure S1: The uncropped blotting images**

**Figure 2**

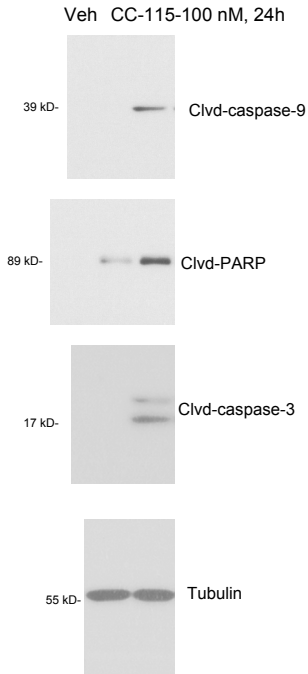

**Figure 4**

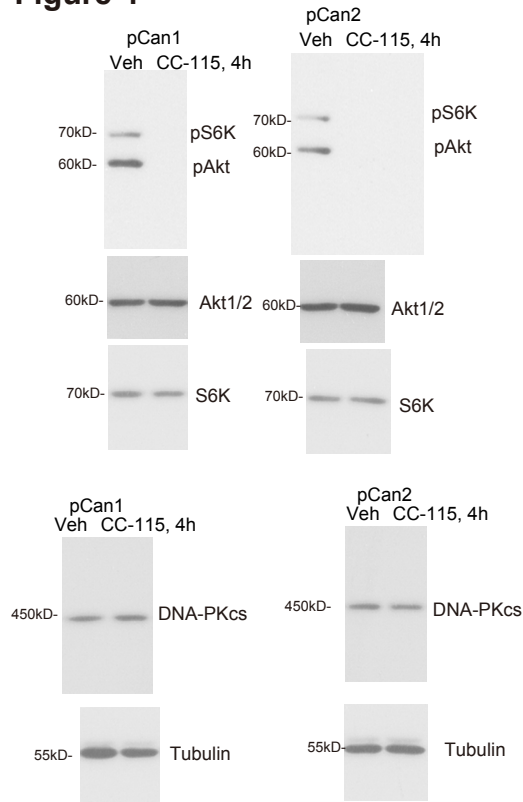

**Figure 6**

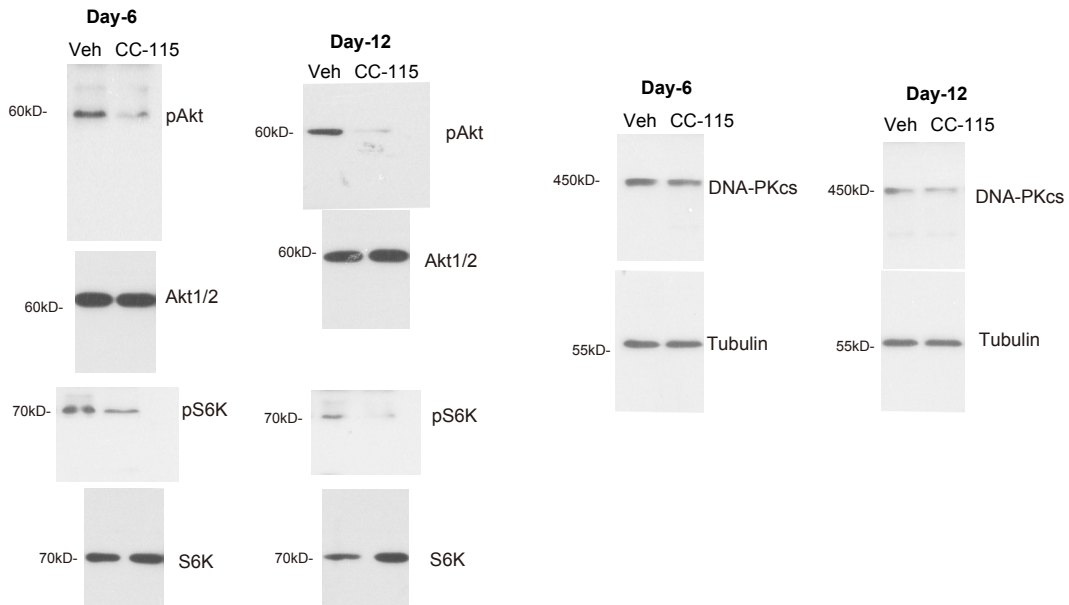

Supplement: 41420_2022_1082_MOESM1_ESM.pdf [file 41420_2022_1082_MOESM1_ESM.pdf]
